# Supplementary material for: Global evidence on health-related quality of life assessment among in university students: a scoping review of instruments and study characteristics
Source: Research Square preprint supplement (doi:10.21203/rs.3.rs-8652432/v1), 2026-01-29
Supplement: Supplementary file 2 [file e033732ed1fd499e4759e93b.xlsx]

## Sheet: Data
Reviewer
Bibliografic informations
Title	The Impact of Physical Education Classes on Health and Quality of Life during the COVID-19	FOOD, EXERCISE AND LIFESTYLE ARE PREDICTORS OF A HEDONIC OR EUDAIMONIC QUALITY OF LIFE IN UNIVERSITY STUDENTS	Nutritional status, eating habits and perception of quality of life of university students of a Public University of the South of Minas Gerais	Influence of Type D personality on quality of life in university students: The mediating effect of health-promoting behavior and subjective health status	Self-efficacy: Relationship with health habits and quality of life in university students from northeast Mexico	Quality of Life and Spirituality in Indian University Students	Physical Fitness, Physical Activity and Quality of Life in Chilean College Students	Internet addiction: Associated with lower health-related quality of life among college students in Taiwan, and in what aspects?	Evaluation of the quality of life and consumption of university fruits and vegetables	Impact of COVID-19 Pandemic on Screen Time: Findings From a Cross-Sectional Observational Study Among College Students From India	Impact of the COVID-19 pandemic on mental health and health-related quality of life among university students in Turkey	Investigation of factors affecting musculoskeletal pain and quality of life in university students Musculoskeletal pain in students	Effects of basic body awareness therapy on pain, sleep, quality of life during COVID-19 pandemic -a randomized controlled study	Do "Stay-at-Home Exercise" Videos Induce Behavioral Changes in College Students? A Randomized Controlled Trial	The impact of sibling status on Chinese college students' quality of life	Health Literacy among Japanese College Students: Association with Healthy Lifestyle and Subjective Health Status	Behavior without beliefs: Profiles of heteronormativity and well-being among heterosexual and non-heterosexual university students in Chile	Evaluation of 8-week body weight control program including sea tangle (Laminaria japonica) supplementation in Korean female college students	The impact of adverse childhood experiences and recent life events on anxiety and quality of life in university students	Investigation the Relation between Sleep and Quality of Life for College Students in Taiwan by Association Rule Mining	Healthy habits and mental health of undergraduates in non-health related careers	Factors Predicting the Quality of Life of University Students in Japan Amidst COVID-19: A Cross-Sectional Study	Association between Experiences in Life and Quality of Life among Lebanese University Students in a Collapsing Country: The Moderating Role of Religious Coping and Positivity	Reduced health-related quality of life among Japanese college students with visual impairment	Quality of Life in College Students with and without Social Phobia	Prevalence and Factors Associated With Suicidal Ideation in Medical Students With Migraine	The role of sources of social support on depression and quality of life for university students	Sociodemographic and Lifestyle Correlates of Health-Related Quality of Life in Croatian University Students	PERSONALITY AND SELF-PERCEPTION OF PHYSICAL AND EMOTIONAL HEALTH AMONG FIRST-YEAR UNIVERSITY STUDENTS	Personality Traits, Cognitive Styles, Coping Strategies, and Psychological Impact of the COVID-19 Pandemic Lockdown on Healthy Youngsters	Behavioral activation for late adolescents with subthreshold depression: a randomized controlled trial	The Participation of University Students in Physical Activities Based on Sport and The Effect of The Students'quality of Life on Academic Achievement and Socialisation (Sample of Eskisehir Osmangazi University)	Effect of dysmenorrhea on quality of life in university students: A case-control study	Social networks and quality of life in relation to university students’ health	Relationships between perceived quality of life and personality styles measured with the Portuguese adaptation of The Millon Index of Personality Styles Revised (MIPS-R)	Quality of life in medical students with internet addiction	Gender Differences Regarding Self-Perceived Physical and Mental Health in Spanish University Sports and Physical Therapy Students after Termination of the COVID-19 Lockdown Period	Comparison of Chronotypes and their Relationship with Academic Performance and Quality of Life in University Students	The Impact of Covid-19 on the Quality of Life Among University Students with Obsessive-Compulsive Disorder	Food Insecurity, Quality of Life, and Diet Optimization of Low Income University Students in Selangor, Malaysia	Health-Related Quality of Life and Injuries in Physical Education Students: A Multi-Group Model According to the Degree of Adherence to the Mediterranean Diet	EFFECTIVENESS OF PHYSICAL ACTIVITY COUNSELING IN UNIVERSITY STUDENTS EDUCATED BY DISTANCE LEARNING DURING COVID-19 PANDEMIC: A RANDOMIZED- CONTROLLED TRIAL	Social Phobia and Its Impact on Quality of Life Among Regular Undergraduate Students of Mettu University, Mettu, Ethiopia	Influence of socio-cultural factors on the emotional problems among college going young-adult children of parents with alcoholism: A study from South India	Prevalence and effects of menstrual disorders on quality of life of female undergraduate students in Makerere University College of health sciences, a cross sectional survey	Association of Night Eating Habits with Health-Related Quality of Life (HRQoL) in University Students	A cross-sectional examination of ontario graduate students' levels of resilience and health related quality of life during the covid-19 pandemic: The CARE study	Symptoms and Health Complaints and Their Association with Perceived Stressors among Students at Nine Libyan Universities	Perceived Stress and Quality of Life Among Final-Year Pharmacy Students in the United Arab Emirates During COVID-19 Pandemic Lockdown
Authors	Jiceh-Der Dong Fang, Pi-Cheng Teng and Fong-Jia Wang	Frantisek Petrovic, Frantisek Murgas, Roman Kralik	Miranda, HFB, Vidigal, FDC	Kim, SR, Nho, JH, Kim, HY.	Salgado-Espinosa, ML, Bermúdez, JA	Deb, S, Strodl, E.	Strale, CM, Giakoni-Ramírez, F, Pinochet, F, Godoy-Cumillaf, A, Fuentes-Merino, P, Duclos-Bastías, D.	Chern, KC, Huang, JH.	Honorato, ACS, de Souza, CA, Francisco, RTD, de Pinho, S, de Pinto, L.	Singh, S, Balhara, YPS, Kattula, D, Ganesh, R, Bhargava, R, Abhijita, B, Gupta, A, Gupta, A.	Cam, HH, Top, FU, Ayyildiz, TK.	Tekin, F, Yarar, F.	Yikilmaz, SK, Güloglu, S, Özek, Ö, Demirtas, M, Aras, GN.	Fukui, K, Suzuki, Y, Kaneda, K, Kuroda, S, Komiya, M, Maeda, N, Urabe, Y.	Edwards, GD, Bangert, AW, Cooch, G, Shinfuku, N, Chen, T, Bi, YY, Rappe, P.	Yokoyama, H, Imai, D, Suzuki, Y, Ogita, A, Watanabe, H, Kawabata, H, Miyake, T, Yoshii, I, Tsubouchi, S, Matsuura, Y, Okazaki, K.	Orellana, L, Alarcón, T, Schnettler, B.	You, JS, Sung, MJ, Chang, KJ.	Davies, E, Read, J, Shevlin, M.	Yang, YC, Liu, JW, Chi, CP, Chang, SP, Chang, KM	Garcia-Pérez, L, Zamorano, S, Rojas-Cepero, I, Miras-Moreno, S.	Hirano, YO, Uchino, R, Tanaka, S, Doi, M, Aramaki, K.	Moussa, S, Malaeb, D, Barakat, M, Sawma, T, Obeid, S, Hallit, S.	Masaki, I.	Ghaedi, G, Tavoli, A, Bakhtiari, M, Melyani, M, Sahragard, M.	Luo, JM, Liu, EZ, Yang, HD, Du, CZ, Xia, LJ, Zhang, ZC, Li, T, Ren, JJ, Tang, JQ, Tang, PQ, Tang, YR, Zhu, S, Bhattarai, N, Bhetuwal, A, Pu, SX.	Alsubaie, MM, Stain, HJ, Webster, LAD, Wadman, R.	Rakovac, M, Pedisic, Z, Pranic, S, Greblo, Z, Hodak, D.	Bobic, J, Cvijetic, S, Macan, J.	Arbol, JR, Ruiz-Osta, A, Aguilar, CIM.	Takagaki, K, Okamoto, Y, Jinnin, R, Mori, A, Nishiyama, Y, Yamamura, T, Yokoyama, S, Shiota, S, Okamoto, Y, Miyake, Y, Ogata, A, Kunisato, Y, Shimoda, H, Kawakami, N, Furukawa, TA, Yamawaki, S.	Yildirim, M, Bayrak, C.	Yilmaz, FA, Avci, D.	Lavalle, MIH, Rivero, MMO, Lavalle, NMJ, Gutiérrez, MCM, Portillo, LDT.	Pires, R, Silva, DR, Ferreira, AS, Fagulha, T.	Almukhtar, NM, Alsaad, SM.	García-Campanario, I, Gil, MJV, Vanlinthout, LE, Pérez, CP, González, CO.	Arastoo, HS, Ghalehbandi, MF, Alavi, K, Kashaninasab, F, Nojomi, M.	Almustafa, R, Alkhoshi, A, Alshaikfh, J, Ayoub, R, Alpfri, Z, Alfakeh, SA.	Rajikan, R, Shin, LH, Hamid, NIA, Elias, SM.	Melguizo-Ibáñez, E, Ubago-Jiménez, JL, Sanz-Martín, D, Alonso-Vargas, JM.	Bargi, G.	Hajure, M, Abdu, Z.	Hebbani, S, Ruben, JP, Selvam, SS, Srinivasan, K.	Odongo, E, Byamugisha, J, Ajeani, J, Mukisa, J.	Kim, Y, Kwak, JH, Paik, JK.	Shillington, KJ, Burke, SM, Mantler, T, Irwin, JD.	El Ansari, W, Khalil, K, Stock, C.	Alomar, M, Palaian, S, Shanableh, S.
Year of Publication	2021	2023	2021	2020	2020	2019	2024	2018	2019	2022	2022	2021	2023	2021	2005	2023	2022	2009	2022	2022	2023	2022	2023	2015	2010	2021	2019	2013	2015	2022	2016	2019	2020	2020	2014	2020	2024	2024	2023	2019	2024	2022	2020	2018	2023	2022	2024	2014	2021
Journal	Applied Sciences	Acta Missiologica	REVISTA BRASILEIRA DE OBESIDADE NUTRICAO E EMAGRECIMENTO	PSYCHOLOGY IN THE SCHOOLS	REVISTA ESPANOLA DE COMUNICACION EN SALUD	APPLIED RESEARCH IN QUALITY OF LIFE	RETOS-NUEVAS TENDENCIAS EN EDUCACION FISICA DEPORTE Y RECREACION	COMPUTERS IN HUMAN BEHAVIOR	REVISTA BRASILEIRA DE OBESIDADE NUTRICAO E EMAGRECIMENTO	JOURNAL OF GAMBLING ISSUES	CURRENT PSYCHOLOGY	ANNALS OF CLINICAL AND ANALYTICAL MEDICINE	ANNALS OF CLINICAL AND ANALYTICAL MEDICINE	SUSTAINABILITY	SOCIAL BEHAVIOR AND PERSONALITY	HEALTHCARE	FRONTIERS IN PSYCHOLOGY	NUTRITION RESEARCH AND PRACTICE	HIGHER EDUCATION	SUSTAINABILITY	SPORT TK-REVISTA EUROAMERICANA DE CIENCIAS DEL DEPORTE	FRONTIERS IN PSYCHOLOGY	HEALTHCARE	BIOPSYCHOSOCIAL MEDICINE	SOCIAL INDICATORS RESEARCH	FRONTIERS IN PSYCHIATRY	INTERNATIONAL JOURNAL OF ADOLESCENCE AND YOUTH	APPLIED RESEARCH IN QUALITY OF LIFE	DRUSTVENA ISTRAZIVANJA	BEHAVIORAL SCIENCES	EUROPEAN CHILD & ADOLESCENT PSYCHIATRY	HACETTEPE UNIVERSITESI EGITIM FAKULTESI DERGISI-HACETTEPE UNIVERSITY JOURNAL OF EDUCATION	CUKUROVA MEDICAL JOURNAL	REVISTA CUIDARTE	Revista Iberoamericana de Diagnostico y Evaluacion-e Avaliacao Psicologica	JOURNAL OF FAMILY MEDICINE AND PRIMARY CARE	HEALTHCARE	SLEEP SCIENCE	JOURNAL OF CONTEMPORARY MEDICAL SCIENCES	JURNAL GIZI DAN PANGAN	EUROPEAN JOURNAL OF INVESTIGATION IN HEALTH PSYCHOLOGY AND EDUCATION	JOURNAL OF BASIC AND CLINICAL HEALTH SCIENCES	ADOLESCENT HEALTH MEDICINE AND THERAPEUTICS	ASIAN JOURNAL OF PSYCHIATRY	BMC WOMENS HEALTH	HEALTHCARE	CURRENT PSYCHOLOGY	INTERNATIONAL JOURNAL OF ENVIRONMENTAL RESEARCH AND PUBLIC HEALTH	ADVANCES IN MEDICAL EDUCATION AND PRACTICE
Study informations
Objective	Examine the effects of the COVID-19 pandemic on the well-being and the quality of life of college students participating in physical education classes	To determine how university students respond to the strong influence of global hedonism in the form of consumer society, individualism, and the cult of the body, youth, and beauty; and to explore the mutual relationship between food, exercise, and lifestyle	Evaluate the nutritional status, eating habits and perception of quality of life of university students	Test a hypothetical path model estimating the influence of Type D personality on health-promoting behaviors (HPB), subjective health status, and quality of life (QoL) in university students, and to verify the mediating effects of HPB and subjective health status between Type D personality and QoL.	To analyze the difference between the level of General Perceived Self-Efficacy (AGP) and the practice or not of healthy habits, as well as to analyze the relationship between AGP and Quality of Life (QoL) in university students in northeastern Mexico.	Examine the association between QoL and spirituality in Indian post-graduate university students.	To determine the relationship between physical fitness, physical activity and quality of life in Chilean university students	Systematically examining the associations between IA and HRQOL with standardized measures	evaluate the quality of life and the consumption of fruits and vegetables by students of courses in the health area of the Colleges of Northern Minas Gerais	Assess the impact of the COVID-19 pandemic on the amount and pattern of screen time among Indian college students	examine if there was an immediate impact of the pandemic on mental health, and on its health-related quality of life among university students in Turkey.	examine the factors affecting musculoskeletal pain and quality of life in university students experiencing musculoskeletal pain.	o investigate the effects of the telerehabilitation-based BBAT (Basic Body Awareness Therapy) approach on body awareness, musculoskeletal pain, sleep, and quality of life (QoL) in university students during the COVID-19 social isolation and home quarantine period.	investigate the improvement in physical activity (PA) resulting from "stay-at-home exercise" among college students	Determine the effects of sibling status on Chinese College students' quality of life	evaluate the current state of HL among Japanese university students. It also examines the factors that influence HL and explores the relationship between HL and health conditions.	The objective of this study was to distinguish profiles of university students based on essentialism and normative behavior, two dimensions of heteronormativity, and to characterize these groups by sexual orientation and gender, perceived social support, physical and mental health, and life satisfaction	evaluate the effects of a body weight control program with supplementation of sea tangle (20 g/day) on 22 female college students	assess whether current life stressors and adverse childhood experiences are associated with a range of wellbeing outcomes in a large sample of university students who participated in the Beyond Adversity research project.	evaluated sleep quality and quality of life of college students in Taiwan by using the Pittsburgh Sleep Quality Index (PSQI) and Short-Form Health Survey (SF-36), respectively	Determine the level of adherence to the Mediterranean diet, the level of physical activity, and the mental health of the quality of Life	identify the factors that predict the QoL of Japanese university students spending their university life amidst the COVID-19 pandemic.	Assess the correlation between positive/negative experiences in life and QOL, taking into consideration the moderating role of positivity and positive/negative religious coping among a sample of Lebanese university students.	Determine if HRQOL is impaired in college students with visual impairment	Assess the psychological impairments and handicaps caused by social phobia, as well as their impact on the Iranian patient's quality of life, and (b) compare the QOL scores of students with social phobia with those without social phobia.	Studied the association between migraine with aura and suicidal ideation and explored the predictive factors for suicidal ideation.	Examined the differential impact of sources of social support on student wellbeing	Assess the health-related quality of life (HRQoL) in a sample of Croatian university students and to determine its association with sociodemographic and lifestyle characteristics.	The aim of this study was to assess the personality traits of neuroticism, extraversion, psychoticism and lie tendencies in a sample of Croatian first-year university students and determine their association with symptoms of depression as well as with the self-perception of physical and emotional health in circumstances that could cause a shift in subjective well-being	explore possible changes in the psychological wellbeing of young healthy students during the initial 14 days of the COVID-19 general lockdown that occurred in March of 2020, and if there was any relation with specific personality traits (neuroticism, psychoticism, and extraversion), cognitive styles (internal and external locus of control and intolerance of uncertainty), and coping strategies.	conduct a randomized controlled trial and examine the efficacy of a face-to-face behavioral activation program targeting late adolescent students having subthreshold depression.	The aim of this study is to evaluate the participation of university students in physical activities based on sport and the effects of quality of life on the students' academic achievement and socialization.	This study aimed to determine the effect of dysmenorrhea on quality of life in university students and the affecting factors.	determine the influence of social networks on the quality of life of young people studying at two public universities in different countries.	to study the relationships between quality of life measured with the Portuguese version of the QOLI and personality styles measured with the Portuguese adaptation of MIPS-R	assess the levels of internet addiction among medical students at a major university in Saudi Arabia and to measure the quality of life among these students.	analyze gender differences in self-reported physical and mental health immediately after the second lock-down restrictions (July 2020 to December 2020) were suspended and physical exercise classes resumed after a break of several months.	investigate the relationship regarding chronotype, quality of life, and academic performance of university students by comparing three educational fields: medicine, technology, and art	Assess the impact of the COVID-19 pandemic on the quality of life of university students diagnosed with obsessive-compulsive disorder (OCD).	determine the relationship between food security with quality of life and nutritional status among low income students in a public university in Selangor, Malaysia.	(a) to study the differences in the effect of the health-related quality of life on injuries according to the degree of adherence to the Mediterranean diet, (b) to analyse the existing differences in the variables that make up the health-related quality of life according to the degree of adherence to the Mediterranean diet, and (c) to analyse the degree of adherence to the Mediterranean diet acco…	reveal the impacts of 4-week physical activity counseling (PAC) on step counts, physical activity (PA), anxiety, depression, and QOL in university students.	assess the prevalence, severity, and quality of life towards social anxiety disorder among students of Mettu University, Ethiopia	examine the role of socio-cultural factors that influence psychopathology in college going young adult children of parents with alcoholism (YACOA)	determine the prevalence of menstrual disorders and to determine the effect of menstrual disorders on quality of life (QOL) of female undergraduate students at Makerere University college of health sciences.	investigate associations between NEHs and HRQoL and to evaluate if their associations may differ according to gender.	(1) examine the self-reported resilience and health-related quality of life (HRQOL) of Ontario graduate students 18 months into the COVID-19 pandemic; and (2) determine whether a relationship existed between graduate students' resilience and HRQOL, in general, and based on gender and degree program.	assessed the frequencies of self-reported students' symptoms (eight health complaints) and two stressors (educational related and general overall). We also examined the associations between the health complaints and students' socio-demographics (five variables—age, marital status, year of study, living arrangement during semester, income sufficiency) and health behaviours/lifestyle features (six …	assessed the impact of COVID-19 lockdown on perceived stress levels and QoL among final-year undergraduate pharmacy students at Ajman University, United Arab Emirates (UAE).
Sample (n) (included)	A sample of 1011 university students (328 male, 683 female).	204	100	380	300	475	131	1439	292	731	1095	218	40	125	1134	1049	552	22	858	1756	184	303	333	21	202	562	461	1163	430	122	118	1026	610	400	43	437	303	400	24	108	556	31	523	1555	275	125	376	1300	81
Country	Taiwan	Slovakia	Brazil	South Korea	Mexico	India	Chile	Taiwan	Brazil	India	Turkey	Turkey	Turkey	Japan	China	Japan	Chile	South Korea	United Kingdom	Taiwan	Grenada	Japan	Lebanon	Japan	Iran	China	England (United Kingdom)	Croatia	Croatia	Spain	Japan	Turkey	Turkey	Colombia; Mexico	Portugal	Saudi Arabia	Spain	Iran	Saudi Arabia	Malaysia	Spain	Turkey	Ethiopia	India	Uganda	South Korea	Canada	Libya	United Arab Emirates
Age	Mean age 20.17 years; standard deviation of age 0.47; age range: 18–23 years	18-32	20-38	>18; 21.64 ± 1.85	18-24 20.53 (±2.19)	20-27; 22.13 (±1.47)	18-32; 20.86 (± 2.1)	>18; 20.51 (±1.82)	21-30	>18; 20.70 years (SD 1.97)	21-35; 21.72 ± 3.47	18-30; (21.22±1.9)	18-25; 20.70 ± 1.21 21.05 ± 0.94	21.6 (± 2.9)	18-20 (20.34)	18-29; 19.8 (± 1.9)	>18; 20.9 (2.28)	19-24; 20.8 ± 0.2	>18; 27.7 years (sd= 13.5)	20-24 ; 21.1	22.75±4.56	18-25; 18.8 (0.89); 21.1 (1.01)	18-30; 22.95 (SD: 4.79)	24.9 ± 6.1 ; 20-39	19-27 (22.1 ± 2.1)	19.7 ± 1.6	>18; 20.62; 18-51	21.49 ± 1.76	18-29; 19.15 (+/-1.52) years	18 to 29; (20.87, SD = 2.21)	18-19; 18.23 (0.42) 18.20 (0.40)	19-27	18-27	19-22	21 (5.9) ; 18-50	24.65 ± 0.87	>18; 21.48 (4.57)	21.06 ± 2.063	23.13 ± 3.0 years (range, 19–29 years)	>18; 19 to 26; 22±1.42	22-30; (25.95 ± 2.768)	≥18; (19.97±1.14)	22.07 (SD = 2.36), 18-32	19.7 yrs (SD = 1.80); 18-24	18-39	19-29; 23.3 (±2.2)	27.8 years (SD = 6.5)	20.9 SD 2.4;	22.1 ±3.09 years
Study tipe/design	cross-sectional survey	cross-sectional survey	Cross-sectional study	Cross-sectional study	Cross-sectional study	cross-sectional study	cross-sectional study	cross-sectional study	cross-sectional study	cross-sectional study	cross-sectional study	cross-sectional study	Randomized Controlled study	randomized controlled trial	cross-sectional	cross-sectional study	cross-sectional study	Nonrandomized uncontrolled trial	cross-sectional study	cross-sectional study	cross-sectional study	cross sectional study	cross-sectional study	cross-sectional study	cross-sectional study	cross-sectional study	cross-sectional study	cross-sectional study	cross-sectional study	Cohort study	randomized controlled trial	cross-sectional study	case-control study	cross-sectional descriptive correlational study	Cross-sectional Study	Cross-sectional Study	Cross-sectional Study	cross-sectional study	cross-sectional study	cross-sectional study	exploratory and comparative in nature; cross-sectional	RANDOMIZED- CONTROLLED TRIAL	cross-sectional study	cross-sectional study	cross sectional study	cross sectional study	cross sectional study	cross sectional study	cross sectional study
Analyzed Variables (n?)	Demographic Data; Participaion in sports; Well-beeing; Quality of life	Demographic Data; Quality of life; Food; exercise; Lifestyle	Demographic data; anthropometric assessment; Nutritional status, eating habits and perception of quality of life	Demographic Data; Type D personality; Health-Promoting Behaviors (HPB); subjective health status, Health Quality	Demographic Data; Health Habits, Perceived General Self-Efficacy Scale and General Satisfaction with Life and Wellbeing subscale were applied.	Demographic Data; Social support; Spirituality attitude inventory; Quality of life	Demographic Data; Physical condition; Physical activity and quality of life	Demographic Data; Internet addiction; Health-related quality of life; background vaiables	demographic data; Food consumption; Quality of life	Demographic Data; Information related to the amount and pattern of screen time usage, change in screen time patterns during the COVID-19 pandemic, and COVID-related stress; QoL; personality	Demographic Data; pandemic's psychological effects; Depression, Anxiety and Stress	Demographic Data; Cornell Musculoskeletal Discomfort Scale; Nottingham Health Profile with gender, age, BMI, smoking habit, exercise habit, and time spent in front of a desk-computer-TV	Demographic data; Pain; Sleep quality; Body awareness; quality of life	Demographic Data; PA; HRQoL; SWB; Psychological Distress	Demographic Data; QoL; Anxiety; depression	namely, demographic characteristics, sources of information on health, the content of health information from the Internet, self-perceived HL, common health problems, and health-related quality of life.	Demographic data; heteronormative attitudes and beliefs; satisfaction with life; quality of life; perceived social support	Demographic data, Body composition, dietary habit scores, serum lipid profiles, daily nutrient intakes and the quality of life	Demographic data; standardised measure of generalised anxiety disorder (GAD-7) and self-reported levels of quality of life, positive physical health and positive mental health	Demographic data; BDI; PSQI; PCS; MCS	Demographic data; level of physical activity, and the mental health of the quality of Life	demographic characteristics, the perceived stress scale (PSS), sense of coherence (SOC), number of social supports, and quality of life (Short Form Health Survey; SF-8)	Demographic data; Quality of life; Positivity; religious confrontation; Negative and positive experiences	Demographic data; Quality of life; physical activity; grip strength; Standing Balance Measurement	demographics characteristics; Quality of life; social phobia; anciety; fear of negative evaluation	Verified Headache Questionnaire, Hamilton Anxiety Scale (24 items), Hamilton Depression Scale (24 items), 36-item Health Survey Brief (SF-36), Headache Impact Text-6 (HIT-6), Test Anxiety Scale (TAS), and Pittsburgh Sleep Quality Index (PSQI). Suicidal ideation was measured by the Self-rating Idea of Suicide Scale (SIOSS).	Demographic variables; Depressive symptoms; Social support; Quality of life	Demographic data; HRQoL; sex, age, body mass index (BMI), settlement size, disposable income, cigarette consumption, alcohol consumption, and exercise frequency.	Depression; personality ; quality of life; gender	Personaloty traits; cognitive styles; Locus of control; stress; psychological well-beeing (QoL); anxiety; depression	demographic data composite International Diagnostic Interview; depression; QoL; Environmental Reward Observation	Demographic information; student performance; physical activity and quality of life; socialization from physical activity	Socio demographic information; n. Body mass index (BMI) was calculated based on the verbal statements of participants and was calculated as weight in kilograms divided by the square of height in meters (kg/m2 ). BMI assessed according to the classification of World Health Organization (WHO); pain severity; QoL	sociodemographic characterization, student behavior in relation to the use of social networks, quality of life measures	QOL and MIPS-R	Sociodemographic characteristics; prevalence and degree of internet addiction; quality of life	Quality of life; sociodemographic characteristics; quality of nutrition; physical activity level	demographics questionnaire, a quality of life assessment questionnaire, the Morningness-Eveningness , Sleep Quality, and the Depression, Anxiety, and Stress	socio-demographic characteristics; symptom severity and overall quality of life during the pandemic.	sociodemographic characteristics, food security status, quality of life, anthropometric data, and dietary intake	PREDIMED questionnaire, the SF-36 questionnaire, and a self-administered questionnaire were used	Step count (pedometer applications), PA (International Physical Activity Questionnaire-short form), anxiety (Beck Anxiety Inventory), depression (Beck Depression Inventory), and QOL (Short Form-36) were evaluated remotely	Socio-Demographic Characteristics , Social Phobia, Social Anxiety Quality of life	demographic characteristics, quality of life, and the role of socio-cultural factors	sociodemographic characteristics; quality of life	socio-demographic factors; night eating habits and dietary factor; QoL	demographic questionnaire, Resilience and quality of life	Health, perceived stressors; marital status, living	demographic variables, stress scale and quality of life
Main findings	As shown in Table 3, participation in sports was positively related to well-being (r = 0.02, p < 0.01), and was positively related to quality of life (r = 0.16, p < 0.01). The impact of the COVID-19 pandemic on the participation in sports and on well-being and quality of life were significant, supporting our hypothesis H1 expectations	The value of quality of life among university students at the time of the ending pandemic (Table 2) can be considered relatively high	Regarding the perception of their health status, in general, 44.0% of the university students reported that their health was very good and/or excellent, 53.0% good, and only 3.0% reported that their health status was poor. On the other hand, a positive correlation was found between the perception of health status, in general, from one year ago and the nutritional status of university students in …	Scores for the four domains of QoL were lower in the Type D group than the non-Type D group, F=57.53, p<.001; F=68.41, p<.001; F=65.34, p<.001; and F=42.17, p<.001, respectively.	The level of quality of life was high in 66.7% of the students; while 28.7% reported a medium level and 4.7%, a low level of satisfaction. According to Spearman's correlation analysis, a statistically significant positive correlation was presented between the variable general perceived self-efficacy and quality of life (r=0.454, p<0.05) (Table 4)	The results of the study indicate that spirituality is independently associated with QoL in this population. The measure of spirituality that had the strongest association with QoL was negative religious coping	Aerobic capacity was positively correlated with health Psychological and perception of health and quality of life	The present study demonstrated that college students with IA had significantly lower HRQOL in physical, psychological, social, and environment domains	It was found that 58% of the students consider their quality of life good or very good. Students with a positive perception of quality of life had a higher prevalence of adequate fruit consumption among students (p=0.012).	There was a small but significant negative correlation between increased screen time and the Q-LES-Q-SF score among the participants (rs = -0.154, n = 681, p o .001). Further, there were significant correlations between Q-LES-Q-SF scores and the extraversion (rs = 0.167, n = 681, p o .001), agreeableness (rs = 0.196, n = 681, p o .001), conscientiousness (rs = 0.239, n = 681, p o .001), and neuro…	The mean scores of Physical Component Summary (PCS-12) and Mental Component Summary (MCS-12) were 66.99 ± 2.14 and 40.76 ± 2.31, respectively. Students suspected of a history with PTSD had considerably lower total scores for PCS-12 and MCS-12, when cross checked for similarity to those without such a history	quality of life was moderately correlated with smoking habits (p<0.05), it was positively correlated with exercise habits (p<0.05). Significant correlations were found between the duration of sitting at the deskcomputer-TV and the quality of life parameters (p<0.05).	In the treatment group, there was a significant difference between the participants' pre-treatment and post-treatment scores in MPQ, PSQI, BAQ and WHOQoL (p < 0.05). However, the pre-treatment and post-treatment scores in the physical health domain of WHOQoL did not significantly differ; therefore, treatment did not yield any result in this domain (p > 0.05) In the control group, there was no sta…	In the SF-8, there was no significant interaction for PCM and MCS (F = 0.28, p = 0.59; F = 2.02, p = 0.15); however, there was a significant interaction for the GH subscale (F = 9.52, p < 0.01).	Small to moderate significant differences were found when comparing only students to sibling students on the WHOQOL-100 with no significant differences on measures of anxiety and depression	The results indicated that high levels of HL were associated with high norm-based scores for physical functioning (ρ = 0.068, p = 0.027), role—physical (ρ = 0.121, p < 0.001), bodily pain (ρ = 0.091, p = 0.003), general health perceptions (ρ = 0.112, p < 0.001), vitality (ρ = 0.104, p < 0.001), role—emotional (ρ = 0.091, p = 0.003), and mental health (ρ = 0.078, p = 0.011). However, HL levels wer…	There were no significant differences among profiles in the number of days with physical difficulties. For mental health difficulties, we found a high number for all groups, reporting between 15 to 19 out of 30 days with these difficulties	Health-related quality of life (HRQOL) at the beginning and at the end of the program is shown in Table 7. The results show significant improvement in subcomponents of quality of life; physical functioning, general health and vitality (P < 0.01).	The mean levels of quality of life (4.8), physical health (4.8) and mental health (4.4) were just above the theoretical mean of the 1–7 scale. Higher levels of life stressors were associated with higher levels of anxiety (r = 0.47, p < 0.001) and lower levels of quality of life (r = − 0.17, p < 0.01), physical health (r = − 0.27, p < 0.001) and mental health (r = − 0.35, p < 0.001). Higher levels…	The mean PCS and MCS scores were 52.9 and 44.1, respectively. The PCS score of the obese and underweight groups was significantly lower than normal and overweight groups. No statistical difference was observed in the MCS score among the BMI groups. This finding suggests that BMI is unrelated with the mental aspect of quality of life. The poor Sleep Quality group had lower PCS and MCS scores, wher…	university students with higher physical activity scores had a better diet and a better level of mental health.	Strong correlations were found between the composite mental summary scores and PSS and number of social supports. The juniors' scores showed a stronger correlation between composite mental summary and composite physical summary, followed by the PSS, and number of social supports. The composite mental summary scores of the seniors showed a stronger correlation with their composite physical summary…	A linear regression, taking the physical QOL score as the dependent variable, showed that living in rural areas compared to urban and more positivity were significantly associated with a better physical QOL, whereas more negative religious coping was significantly associated with a lower physical QOL. More positivity and more positive religious coping were significantly associated with a better m…	No between-group differences were found in the SF-36 scores. However, compared to the general Japanese standards, the Vitality scores of the blind group were lower and the Physical Function scores of the severely impaired group were higher. In addition, a negative correlation was found between standing balance (variability of foot center of pressure) and the Physical Component Summary score of th…	Comparison of quality of life scores for the two groups indicated that persons with social phobia scored significantly lower on several SF-36 scales indicating a reduced quality of life. Significant reductions in self-rated quality of life were evident for the following scales: general health , Vitality, Social functioning, Role functioning—emotional, and Mental health. 36.1% of all students with…	Almost all the psychological factors had a significant association with suicidal ideation as well as low SF-36 (OR = 0.9, 95% CI 0.87–0.92, p < 0.01) scores.	An analysis of variance (ANOVA) on depression groups showed significant differences between the groups in quality of life, for the psychological, and social relationships domains. A post hoc Tukey HDS test showed that the no depression group reported higher scores and differed significantly from the mild to moderate depression group, and moderately severe to severe depression group in all quality…	The HRQoL scale on which Croatian students scored the highest was Physical Functioning. High mean scores were also found for other physical health measures, while the scores in mental health scales were somewhat lower. Male students scored significantly higher than females on all SF-12 scales (p < 0.05). The regression analysis showed that Physical Component Summary score (PCS) is negatively rela…	The obtained results showed that students rated their health and health-related quality of life as good, although they scored lower than same aged adults from the general population. and men scored higher on six out of eight SF-36 scales	There were also found to be significant differences in three out of eight SF-36 scales: Mental Health (F(2, 242) = 14.765, p < 0.001, ηG2 = 0.019, ηp2 = 0.109), Vitality (F(2, 242) = 12.841, p < 0.001, ηG2 = 0.015, ηp2 = 0.096), and Role-Emotional (F(2, 242) = 3.847, p = 0.03, ηG2 = 0.007, ηp2 = 0.031); as well as in the global score of Quality of Life (F(2, 242) = 8.414, p = 0.001, ηG2 = 0.008, …	The group by time interaction was also significant for the HRQOL (p = 0.04), and VAS-QOL (p = 0.02) (Tables 2, 3). The effect size of HRQOL and VAS-QOL for between-group differences were 0.57 and 0.77.	a significant relationship (p<0.01) in a positive way has been determined between physical activities based on sports and quality of life (0.57), between joining in physical activities based on sports and academic standing (0.43), between joining in physical activities based on sports and socializing (0.31), between quality of life and academic standing (0.31), between quality of life and sociali…	In students with dysmenorrhea, physical health, psychological health, social relationships, and Environmental Health subscales mean scores were significantly lower than those in the control group (p<0.001). physical health mean score was statistically significantly lower in students whose menstrual bleeding duration were ≥7 days, physical and psychological health mean scores were lower in student…	Thus, Colombians have a better perception with an average score of 58.5 and a standard deviation of 21 points while Mexicans have an average score of 38.3 and standard deviation of 20 points, that is, the 70 point barrier is not exceeded in any of these countries, indicating that there is not a good perception of health for respondents. When the p-value of 0.018 associated with test statistics is…	the personality styles that are most closely related to high levels of life satisfaction: the motivation to care for and protect others, the initiative to change life circumstances in order to achieve goals and satisfy wants and needs, and the optimism with which one faces the present and future. Moreover, it seems that acting in a traditional and conformist way contributes more to life satisfact…	The mean quality of life in subdomains of the physical domain, psychological domain, and social relations domain did not have any significant differences between the two groups	Regarding health-related quality of life, assessed with the SF-12 questionnaire, significant sex differences were found in 9/12 items (SF1, SF3, SF4, and SF7-SF12). Men believed that they had a greater perception of their state of health. Among the physiotherapy and physical activity students, we also found significant differences in health limiting some activities of daily life (SF3 (physical fu…	The highest scores on the WHOQOL-BREF (better quality of life) were associated with environmental health, and the lowest, with physical health. Morning-type and better sleep quality have been associated with better physical and environmental health. In the evaluation of the correlations involving all aspects of quality of life and the MEQ and PSQI scores, sleep quality and chronotype were associa…	two-thirds of the students had very good to excellent overall health (66.6%, n = 16), and nearly half of them reported better health status compared with that of the previous year. The results revealed that only the SF-36 role limitation due to emo-tional problems domain was significantly associated with the Y-BOCS level of symptoms. Regarding the correla-tion between SF-36 health survey domains …	for quality of life, students scored highest in social relationship domain (68.60±14.53) while lowest in physical health domain (53.87±10.42). There was no significant association between food security and quality of life, ethnic, age, family income, financial assistance, CGPA, and food expenditure (p>0.05).	The results showed that high adherence to the Mediterranean diet was associated with higher quality of life and lower injury rates. It was also observed that high adherence to the Mediterranean diet improved the effect of the quality of life on injuries. In conclusion, the Mediterranean diet is beneficial for the quality of life of young university students.	After PAC, step count (mean difference (MD): 3999.69 steps/day, Cohen's d=1.8), total walking (MD: 734.15 MET-min/week, Cohen's d=0.4) and total PA (MD: 924.22 METmin/week, Cohen's d=0.4) scores, and role limitations due to emotional problems, vitality, and emotional well-being subscales scores of QOL significantly increased in PAC group compared with controls; anxiety scores decreased vice versa…	mean total quality of life score was found to be (70.87+16.22). The highest QOL domain of the students with social phobia in the current study was environmental health domain mean score of (23.55 ± 3.46), followed by physical health domain mean score of (22.34±3.76), psychological health domain mean score of (17.67±2.62) and social relationships domain mean score of (6.87±2.27). WHOQOL-BREF-TR sc…	WHO-QOL scores were significantly lower among YACOA with psychopathology compared to YACOA without psychopathology. A considerable proportion of Young-adult children of alcoholics reported emotional psychopathology and their quality of life was poor.	Dysmenorrhea and premenstrual symptoms significantly reduced the QOL scores of participants. Most of participants who reported any of the menstrual disorders scored less in quality of life compared to those who did not though in some instances the differences were not statistically significant.	There was a significant difference in the distribution of HRQoL with night eating frequency and whether or not to eat with others in males. In males, subjects with night eating frequency ≥ 1 time/week had a tendency higher HRQoL 1.49 (±0.84) than those with night eating frequency <1 time/week. No statistical significance was observed in night eating frequency and HRQoL in females. Females who ans…	Participants reported low resilience (M = 26.04, SD = 6.31) and, with respect to HRQOL, high physical functioning (M = 91.63, SD = 14.28) and low role limitations due to emotional problems (M = 37.61, SD = 40.52) Resilience was positively associated with HRQOL	For quality of life, those feeling bad/very bad quality of life had consistently significantly higher ratings of symptoms (except for headache). Students who watched their health not much/not at all (lower health awareness) had significantly higher ratings of depressive mood and difficulties to concentrate. Students who watched their health not much/not at all (lower health awareness) were more l…	a median (IQR) score of 3 (3–4) was obtained for the question on "How much do you enjoy life?", and the median scores were "4 (very much)" for more than half of the statements overall denoting a better QoL. The study reported females to have more physical pain, which may prevent them from carrying out their daily activities, than males (p=0.001) reflecting a better QoL among males over females du…
Characteristics of quality of life instruments
Instrument name	The Quality of Life Scale (QOLS) by Burckhardt and Anderson	Cantril Scale of 0-10	SF-36	WHOQoL-BREF (Korean Version)	Quality of Life Enjoyment and Satisfaction Questionnaire (Q-LES-Q)	WHOQOL-BREF	WHOQOL	WHOQOL-BREF	Questionnaire made by the authors	Quality of Life Enjoyment and Satisfaction Questionnaire-Short Form (Q-LES-Q-SF)	SF-12	NHP (Nottingham Health Profile)	WHOQoL-BREF	SF-8	WHOQoL-100	SF-36	Health-related quality of life index (HRQOL-4)	SF-36	Questionnaire made by the authors	SF-36	SF-36	SF-8	SF-12	SF-36	SF-36	SF-36	WHOQoL-BREF	SF-12v2	SF-36	SF-36	EQ-5D	WHOQoL-BREF	WHOQoL-BREF	SF-12v2	QOLI	WHOQoL- BREF	SF-12	WHOQOL-BREF	SF-36	WHOQOL-BREF	SF-36	SF-36	WHOQOL – BREF	WHOQOL – BREF	WHOQOL – BREF	HINT-8	RAND-36	Taken from another study	WHOQOL – BREF
Instrument itens	28-item	1 ("What is the quality of your life?)	36	26	93	26 (24 used)	26	26	1	16	12	38	26	8	100	36	4 (but only used 2)	36	1	36 (Physical component scale; mental component scale)	36 (Physical component scale; mental component scale)	8 (Physical component scale; mental component scale)	12 (Physical component scale; mental component scale)	36 (Physical component scale; mental component scale)	36 (Physical component scale; mental component scale)	36 (Physical component scale; mental component scale)	26	12 (physical component Summmary; mental component summary)	36 (Physical component scale; mental component scale)	36 (Physical component scale; mental component scale)	5	26	26	12 (physical component Summmary; mental component summary)	32 (satisfaction and importance)	26	12	26	36	26	36	36	26	26	26	8	36	1	25 (one was withdrawn)
Instrument domains	material and physical well-being, relationships with other people, social, community, and civic activities, personal development and fulfillment, and recreation	.	Functional capacity", "physical aspects", "pain", "general health status", "vitality", "social aspects", "emotional aspects", and "mental health".	Physical health, psychological health, social relationships, and environment	8 (but only used one, "general life satisfaction and well-being")	Physical health, psychological health, social relationships, and environment	Physical health, psychological health, social relationships, and environment	Physical health, psychological health, social relationships, and environment	Obtained by the question "How do you think your quality of life is?	physical health, mood, work, household and leisure activities, social and family relationships, daily functioning, sexual life, economic status, and overall well-being	Physical Component Summary; Mental Component Summary	pain, physical activity, energy, sleep, social isolation and emotional reaction	(i) Psychological domain which comprised of six items about body image, positive & negative feelings, self-esteem, personal beliefs, thinking and concentration; and (ii) the Social Relationships domain which comprised of three items about personal relationships, social support and sexual relationships	physical function (PF), role physical (RP), bodily pain (BP), general health (GH), vitality (VT), social function (SF), mental health (MH), and role emotional (RE)	physical health, psychological state, independence, social relationships, spiritual beliefs, and environment relationships	Functional capacity", "physical aspects", "pain", "general health status", "vitality", "social aspects", "emotional aspects", and "mental health".	participants experienced either physical or mental health problems in the last 30 days at the time of responding the questionnaire	Functional capacity", "physical aspects", "pain", "general health status", "vitality", "social aspects", "emotional aspects", and "mental health".	Participants were asked to rate their perceived 'quality of life' on a scale from (1) 'worst I can imagine' to (7) 'best I can imagine'.	Functional capacity", "physical aspects", "pain", "general health status", "vitality", "social aspects", "emotional aspects", and "mental health".	In this study, only the dimension of MS is considered, where concepts of vitality, social function, emotional role and mental health are measured	general health, physical functioning, physical role, bodily pain, vitality, social functioning, mental health, and emotional roles	general health, physical functioning, physical role, bodily pain, vitality, social functioning, mental health, and emotional roles	"physical function", "role limitations due to physical problems", "bodily pain", "general health perceptions", "vitality", "social function", "role limitations due to emotional problems", and "mental health". One item that focused on changes in health was excluded from this study.	Physical Functioning, Role Physical, Body Pain, General Health Perceptions, Vitality, Social Functioning, Role Emotional, and Mental Health	Physical Functioning, Role Physical, Body Pain, General Health Perceptions, Vitality, Social Functioning, Role Emotional, and Mental Health	(i) Psychological domain which comprised of six items about body image, positive & negative feelings, self-esteem, personal beliefs, thinking and concentration; and (ii) the Social Relationships domain which comprised of three items about personal relationships, social support and sexual relationships	Physical Functioning, Role Physical, Bodily Pain, General Health, Vitality, Social Functioning, Role Emotional, and Mental Health	Physical Functioning, Role Physical, Body Pain, General Health Perceptions, Vitality, Social Functioning, Role Emotional, and Mental Health	Physical Functioning, Role Physical, Body Pain, General Health Perceptions, Vitality, Social Functioning, Role Emotional, and Mental Health	health-related quality of life; visual analog scale (VAS) to evaluate the overall health status	(i) Psychological domain which comprised of six items about body image, positive & negative feelings, self-esteem, personal beliefs, thinking and concentration; and (ii) the Social Relationships domain which comprised of three items about personal relationships, social support and sexual relationships	(i) Psychological domain which comprised of six items about body image, positive & negative feelings, self-esteem, personal beliefs, thinking and concentration; and (ii) the Social Relationships domain which comprised of three items about personal relationships, social support and sexual relationships	Physical Functioning, Role Physical, Bodily Pain, General Health, Vitality, Social Functioning, Role Emotional, and Mental Health	16 areas of life, of which Health, Family, Love, Work, etc. stand out.	Two global items about the quality of life and health, seven items about physical health, six items about psychological health, three items about social relationship, eight items about environment.	Physical Functioning, Role Physical, Bodily Pain, General Health, Vitality, Social Functioning, Role Emotional, and Mental Health	physical health, psychological health, social relationships, and environmental health, and it also assesses overall quality of life and general health	physical functioning, bodily pain, energy/fatigue, social func-tioning, emotional well-being, general health perception, and role limitations due to physical, personal, or emotional problems	physical health, psychological health, social relationships, and environmental health, and it also assesses overall quality of life and general health	physical functioning (FF), physical role (RF), bodily pain (DC), general health (SG), vitality (VT), social functioning (FS), emotional role (RE), and mental health (SM)	physical functioning (FF), physical role (RF), bodily pain (DC), general health (SG), vitality (VT), social functioning (FS), emotional role (RE), and mental health (SM)	physical health, psychological health, social relationships, and environmental health, and it also assesses overall quality of life and general health	physical health, psychological health, social relationships, and environmental health, and it also assesses overall quality of life and general health	physical health, psychological health, social relationships, and environmental health, and it also assesses overall quality of life and general health	eight questions (climbing stairs, pain, energy, working, depression, memory, sleeping, and happiness) focused on the self-perception of general health, physical health, mental health, and the limitations on activity.	(1) physical functioning; (2) role limitations due to physical health problems; (3) role limitations due to emotional problems; (4) energy/fatigue; (5) emotional wellbeing; (6) social functioning; (7) Bodily Pain; and (8) general health perceptions.	"If you consider the quality of your life: How did things go for you in the last four weeks?"	physical health, psychological health, social relationships, and environmental health, and it also assesses overall quality of life and general health
Frequency of use of the instrument	1	1	1	1	1	1	1	1	1	1	1	1	2	2	1	1	1	2	1	1	1	1	1	1	1	1	1	1	1	3	2	1	1	1	1	1	1	1	1	1	1	1	1	1	1	1	1	1	1
Publication language	English	English	Portuguese	English	Spanish	English	Spanish	English	Portuguese	English	English	English	English	English	English	English	English	English	English	English	English	English	English	English	English	English	English	English	English	English	English	Turkish	English	English	Portuguese	English	English	English	English	English.	English.	English	English	English	English	English	English	English	English
Sample Sex	328 male, 683 female).	Don't specify	77 women and 23 men	219 male and 161 female	168 Male 132 Female	241 males and 234 females	104 males 27 females	599 males and 840 female	60 males and 232 females	358 male 373 female	278 males and 816 females	98 males and 120 females	5 males and 35 females	57 male 68 female	538 males and 596 females	623 males and 413 females 13 preferred not to respond	413 females, 115 males and 24 non binary	22 females	263 males and 595 females	958 male and 798 female	73 males and 111 females	144 male and 159 female	114 male and 219 female	18 male 3 female	98 male 104 female	114 male 448 female	83 males 378 females	437 males and 726 females	118 males 312 females	26 males and 96 females	Don't specify	527 males and 499 females	610 females	92 males and 308 females	7 males 36 females	128 male, 271 female and 38 not indentify as male or female	191 male and 112 female	131 males and 269 females	12 males and 15 females	46 males and 62 females	Don't specify	3 male; 28 female	270 males and 253 females	741 males and 814 females	275 females	52 males and 73 females	77 males, 258 female and 10 non-binary	439 males and 861 females	16 males and 65 females
Did use a validated translation of the instrument?	Don't specify	N/A	Yes	yes	Don't specify	Yes	Yes	Yes	N/A	He didn't speak	yes	yes	yes	yes	yes	Yes	Yes	yes	N/A	yes	yes	yes	yes	yes	yes	Don't specify	yes	Don't specify	yes	yes	yes	yes	yes	yes	yes	yes	yes	yes	yes	yes	yes	yes	yes	Don't specify	yes	yes	yes	N/A	N/A
Online version of the instrument or face-to-face paper?	face-to-face	Internet and face-to-face interview	face-to-face	face-to-face	face-to-face	face-to-face	face-to-face	face-to-face	Don't specify	Online	Online (online survey) did not specify	Online or Phone	online	Online	face-to-face	Online	Online	face-to-face	online	Don't specify	Online	Online	Online	Online or in-person	face-to-face	Online	Online	Don't specify	Neither of them (took home to answer)	online	face-to-face	Don't specify	face-to-face	Don't specify	face-to-face	Don't specify	online	online	Online	face-to-face	online	online	Don't specify	face-to-face	They received it in person but did not need to respond immediately	Don't specify	online	face-to-face	Online
Did you use all the demands of the tool?	Yes	Yes	yes	Yes	No	No	Yes	Yes	Yes	yes	Yes	yes	yes	yes	Yes	Yes	No	yes	yes	yes	yes	yes	yes	yes	yes	yes	No (Physicological Domain, Social Relationships)	yes	yes	yes	yes	yes	yes	yes	yes	yes	yes	yes	yes	yes	yes	yes	yes	yes	yes	yes	yes	yes	No
Funding?	No	Doesn't Speak	Doesn't Speak	Yes	Don't specify	Don't specify	Don't specify	Yes	Don't specify	No	No	No	yes	Yes	Don't specify	Yes	Yes	yes	yes	yes	No	yes	No	yes	Don't specify	Yes	yes	Don't specify	Don't specify	No	yes	Don't specify	No	Don't specify	Don't specify	Not	No	No	No	yes	Don't specify	No	No	Don't specify	yes	Not	Not	Don't specify	No
Did use a validated instrument?	Yes	No	Yes	Yes	Yes	yes	Yes	Yes	No	Yes	yes	yes	yes	yes	yes	Yes	Yes	yes	No	yes	yes	yes	yes	yes	yes	Yes	yes	yes	yes	yes	yes	yes	yes	yes	Yes	yes	yes	yes	yes	yes	yes	yes	yes	yes	yes	yes	yes	No	yes
[truncated: 189 more columns]
